# Supplementary material for: Non-linear intensification of monsoon low-pressure systems by the BSISO
Source: Copernicus journal article supplement (doi:10.5194/wcd-3-1341-2022), 2022-11-18
Supplement: Supplementary file 1 [file wcd-3-1341-2022-supplement.pdf]

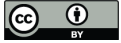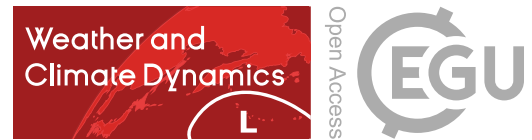

*Supplement of*

## **Non-linear intensification of monsoon low-pressure systems by the BSISO**

**Kieran M. R. Hunt and Andrew G. Turner**

*Correspondence to:* Kieran M. R. Hunt ([k.m.r.hunt@reading.ac.uk](mailto:k.m.r.hunt@reading.ac.uk))

The copyright of individual parts of the supplement might differ from the article licence.

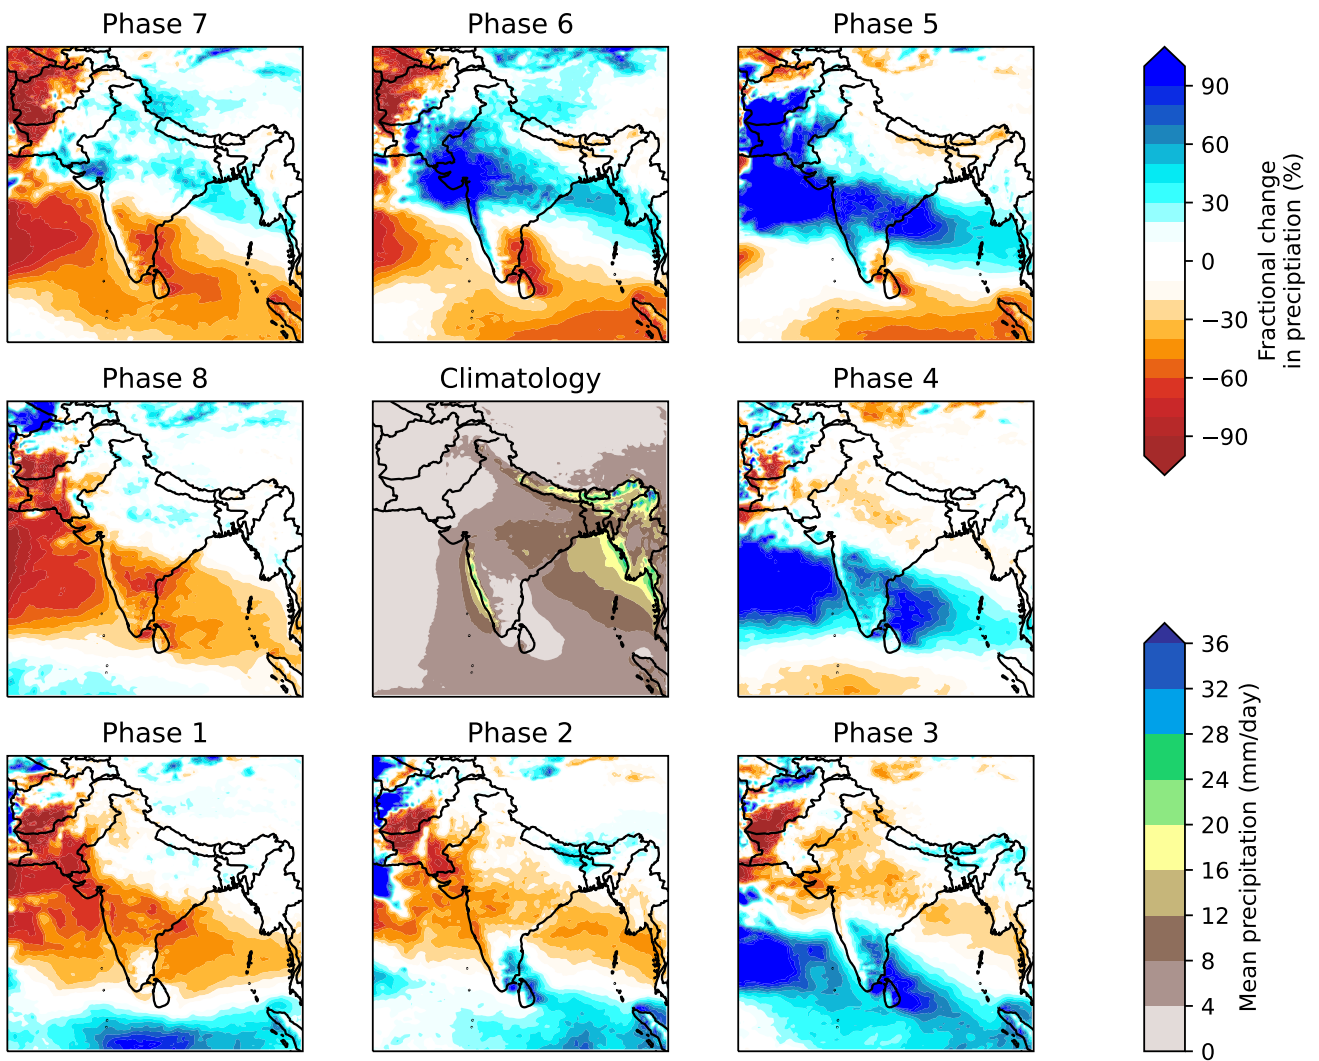

**Figure S1:** The effect of the BSISO on monsoon precipitation over South Asia. The central panel gives the climatological June to September values. Panels around the edge show the fractional change for each phase of the BSISO, measured against the climatology.

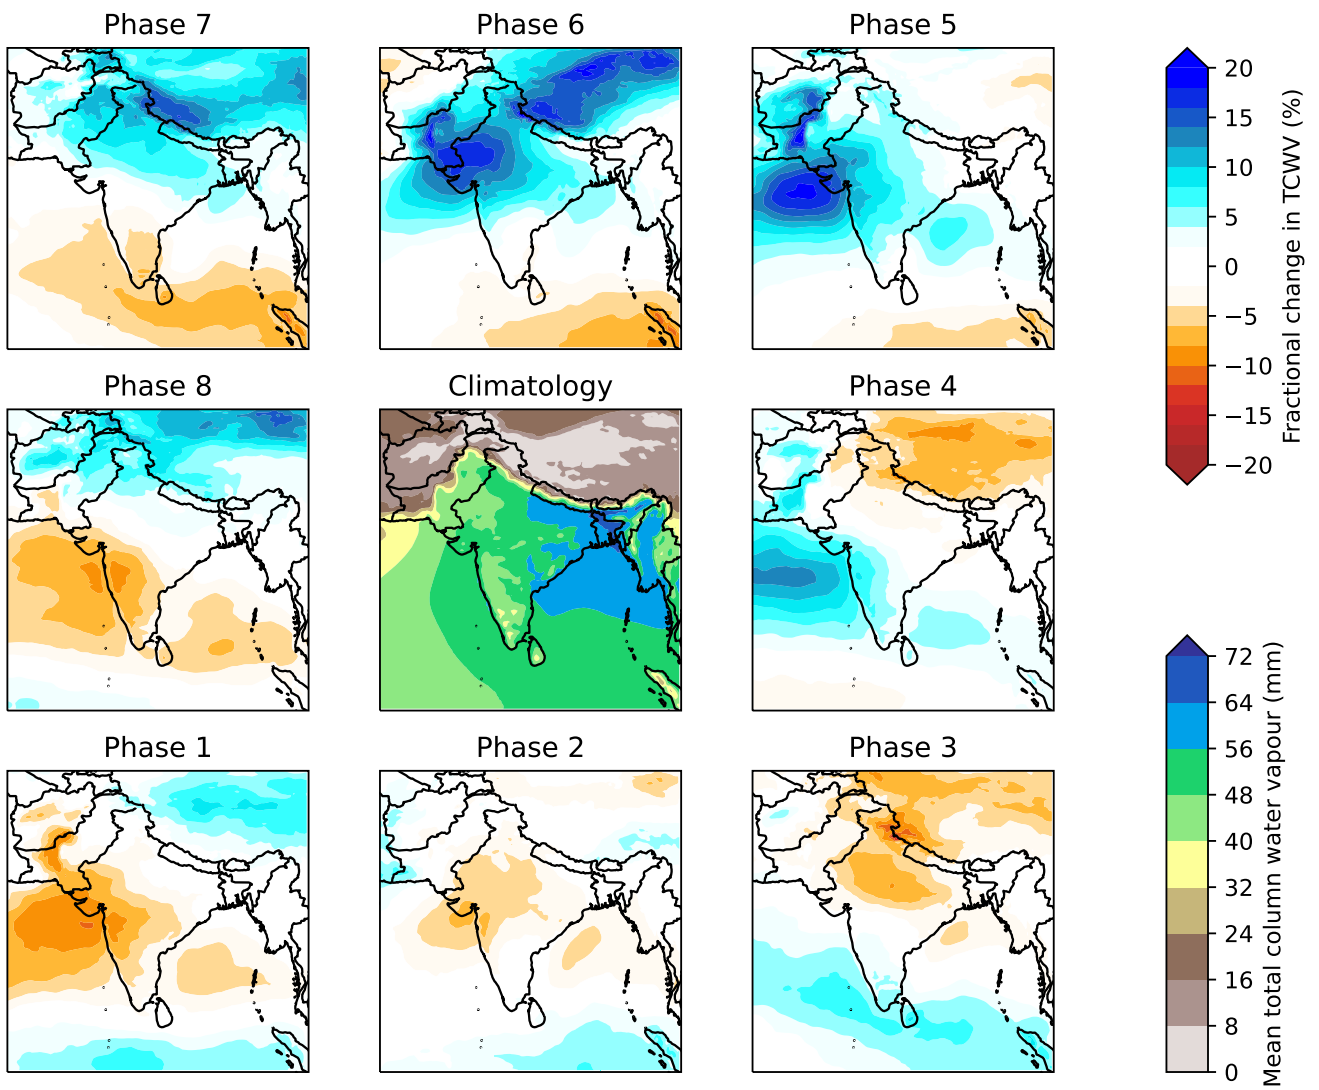

**Figure S2:** The effect of the BSISO on total column water vapour during the summer monsoon over South Asia. The central panel gives the climatological June to September values. Panels around the edge show the fractional change for each phase of the BSISO, measured against the climatology.

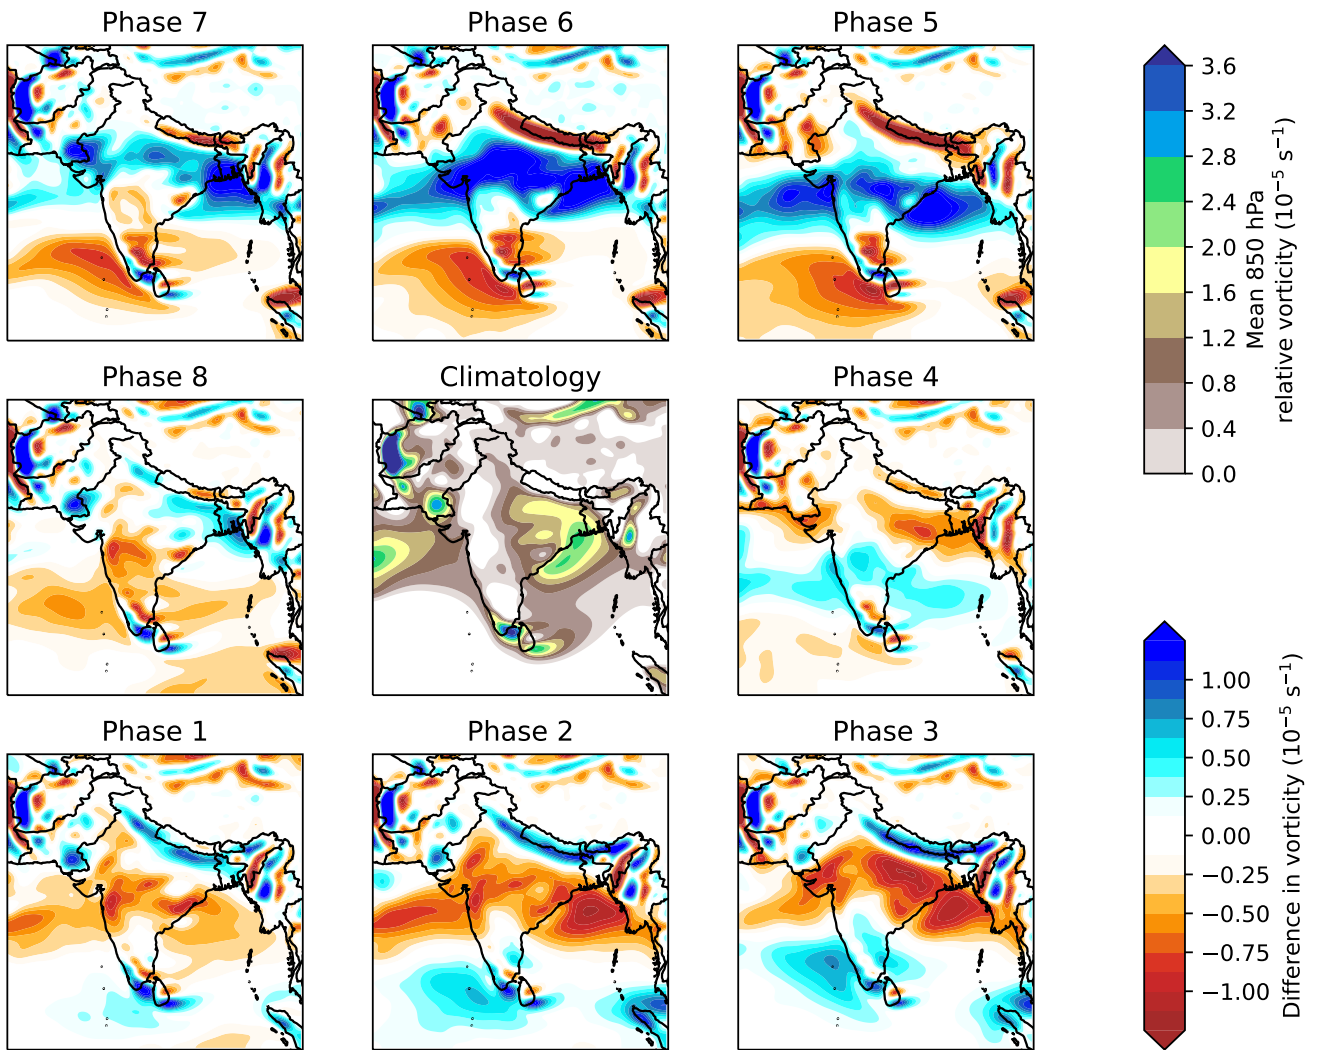

**Figure S3:** The effect of the BSISO on 850 hPa relative vorticity during the summer monsoon over South Asia. The central panel gives the climatological June to September values. Panels around the edge show the absolute change for each phase of the BSISO, measured against the climatology.
